# Supplementary material
Source: Springer Nature journal article supplement (https://www.springermedizin.de/resource/supplementary/12943_2009_565_MOESM3_ESM.pdf/9554982)

## A. Relative chromosomal locations of BRCA2 and ZAR2 genes

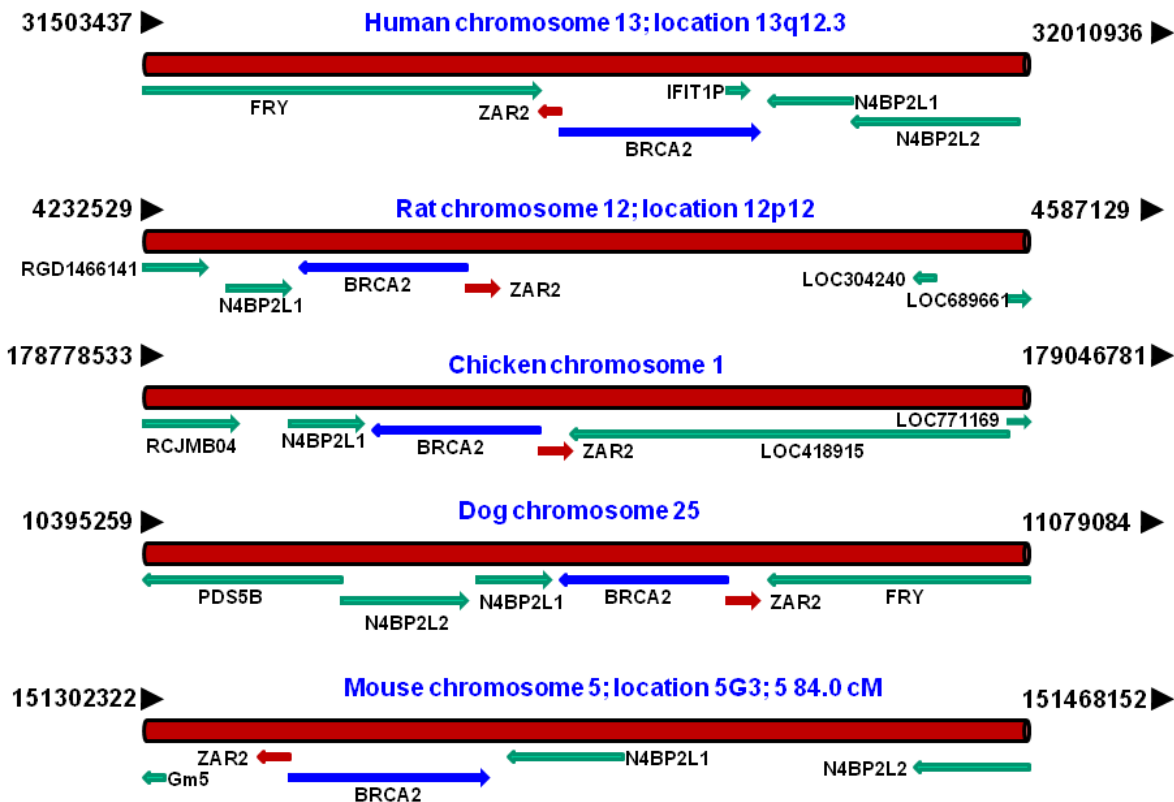

## B. Dendrogram with branch length

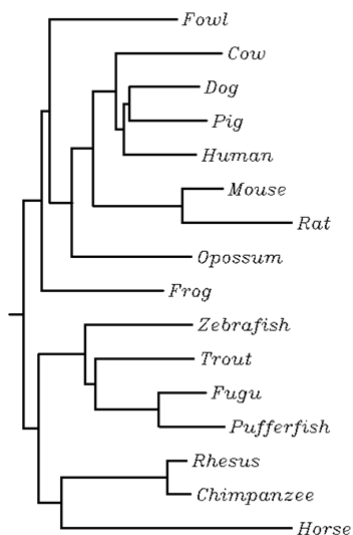

Supplement: MOESM3 [file 9554982]
